# Supplementary material for: Clonal conversion of B lymphoid leukemia reveals cross-lineage transfer of malignant states
Source: PubMed Central journal article supplement — Genes Dev. 2016 Nov 15;30(22):2486–99. doi: 10.1101/gad.285536.116 (PMC5159664; doi:10.1101/gad.285536.116), 2016-11-15

Supplementary figure 1 (S1)

TH-LN484

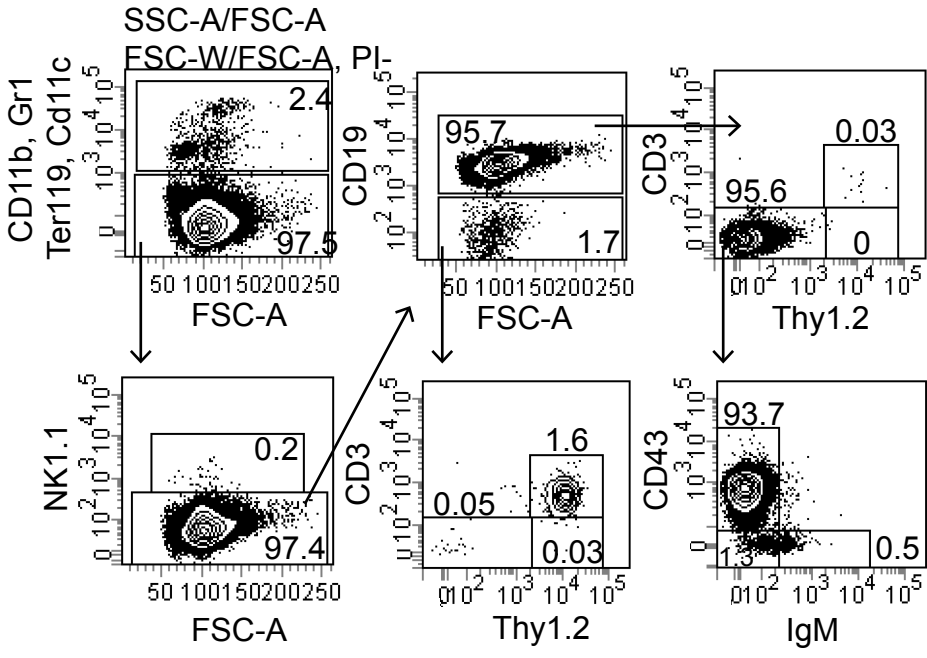

Supplementary figure 2 (S2)

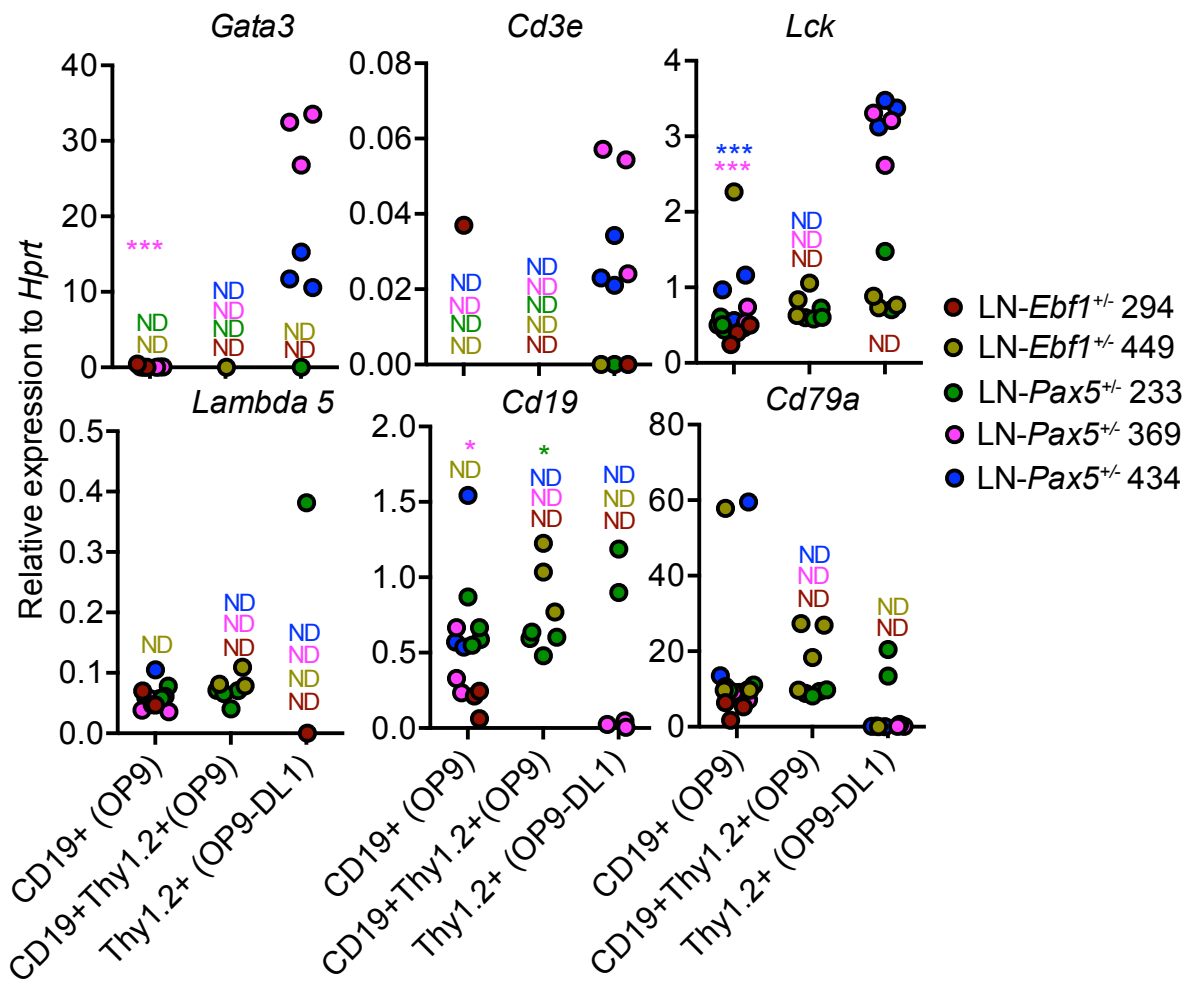

PI-GFP<sup>+</sup>

*TH*-LN1103

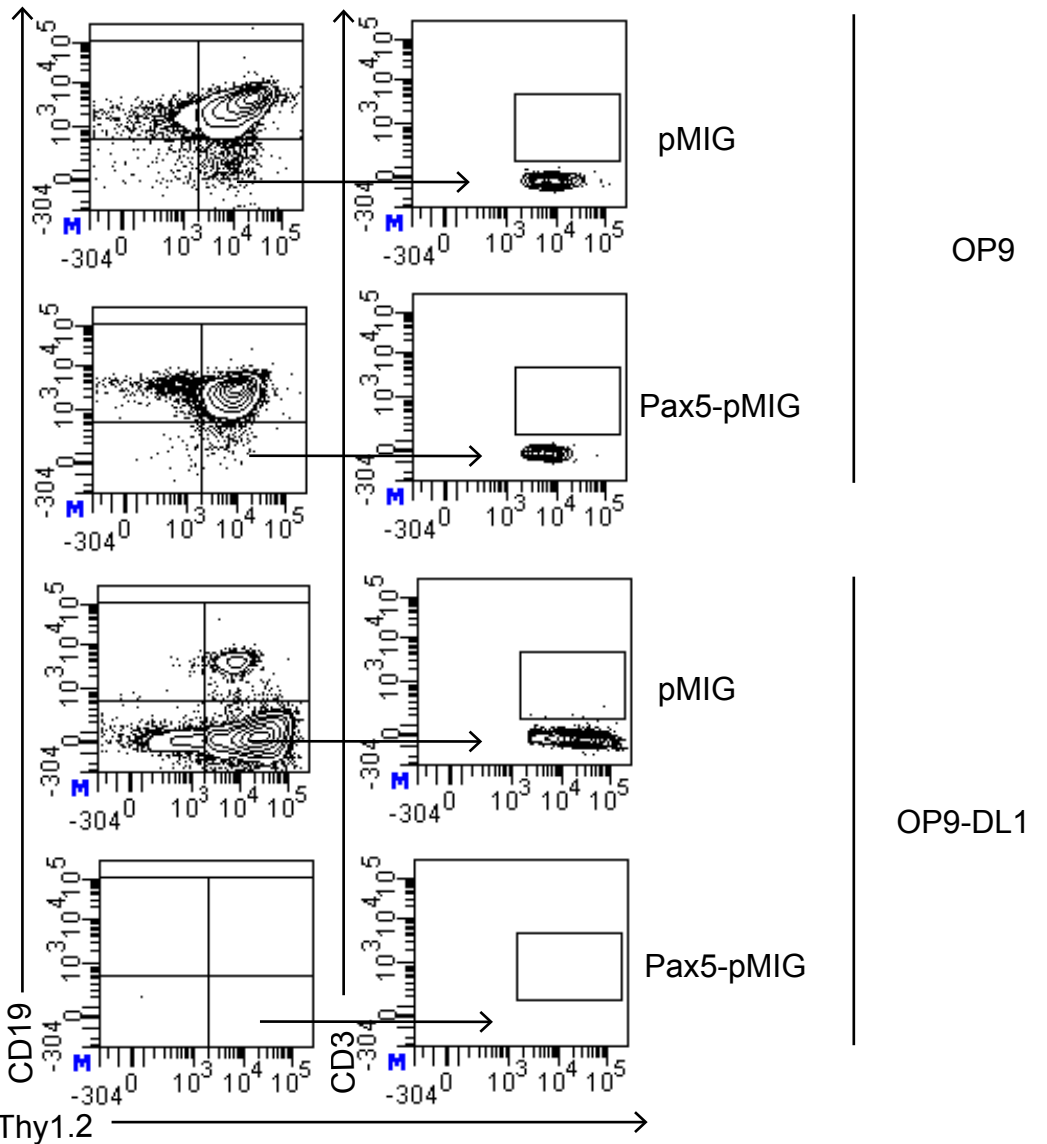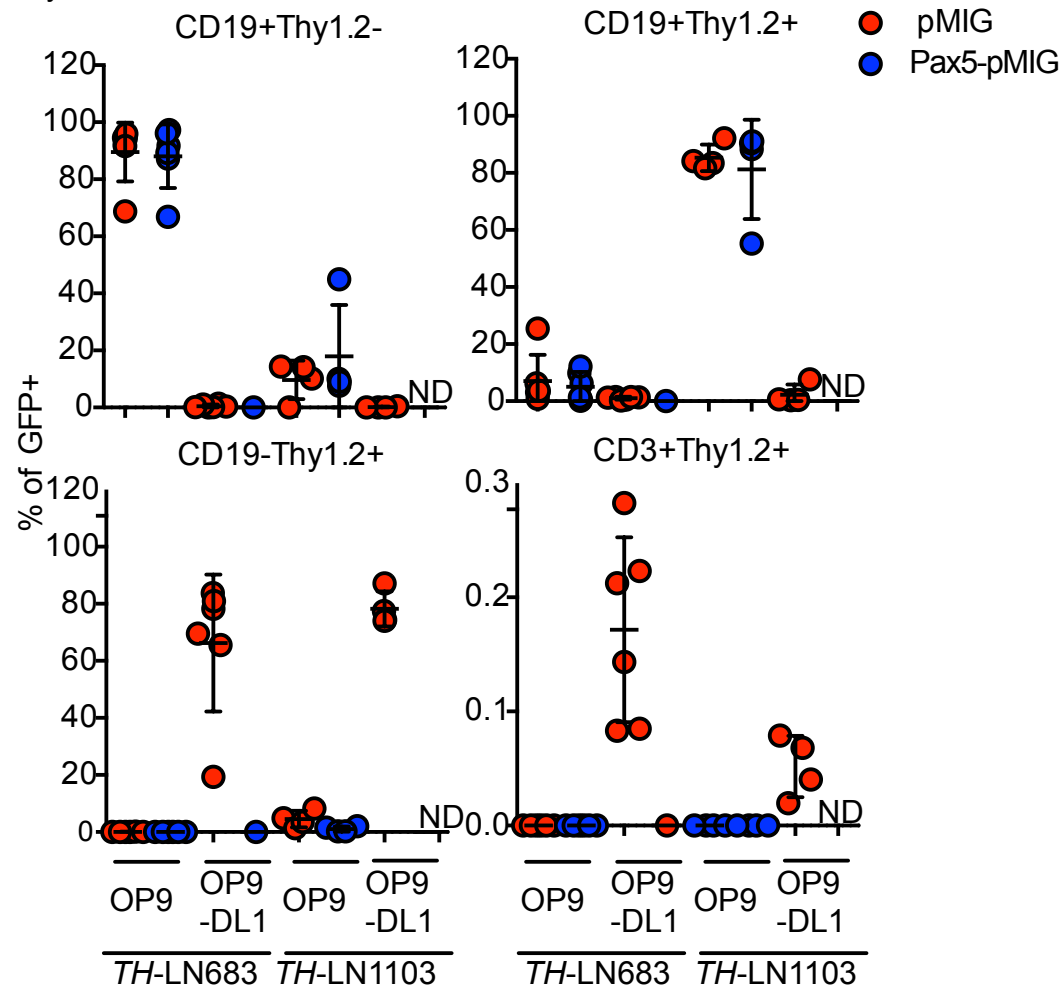

Supplementary figure 4 (S4)

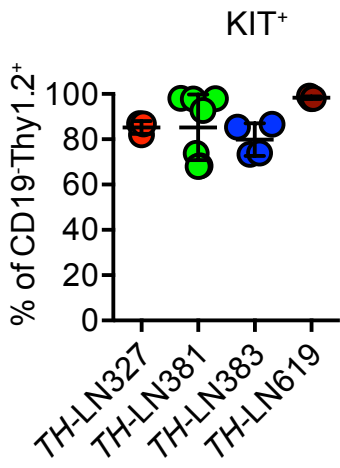

Supplementary figure 5 (S5)

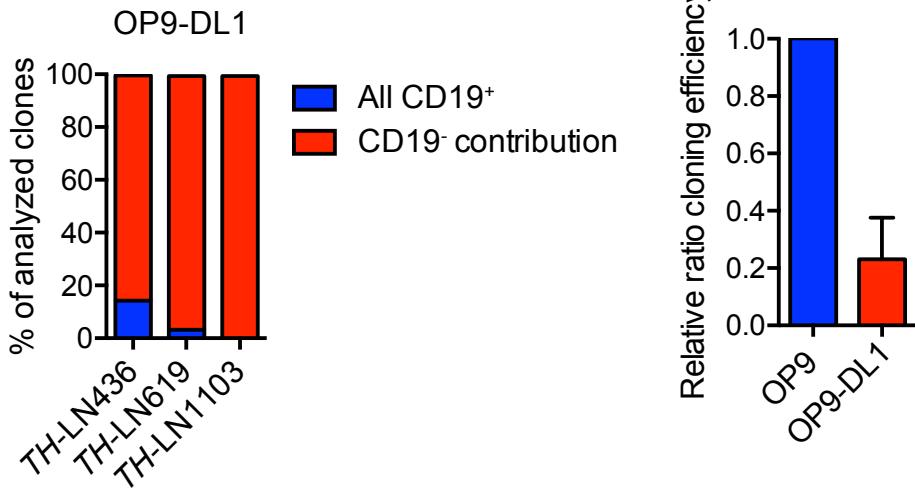

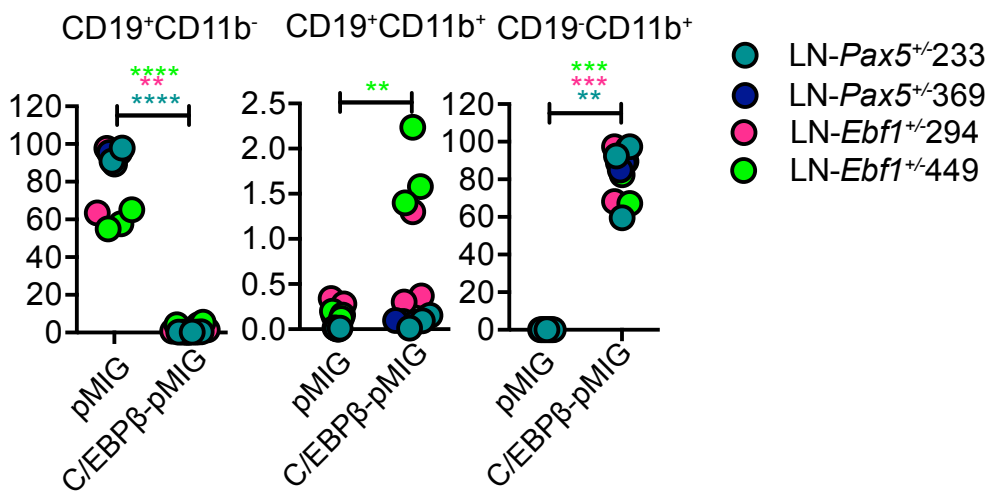

Supplementary figure 7 (S7)

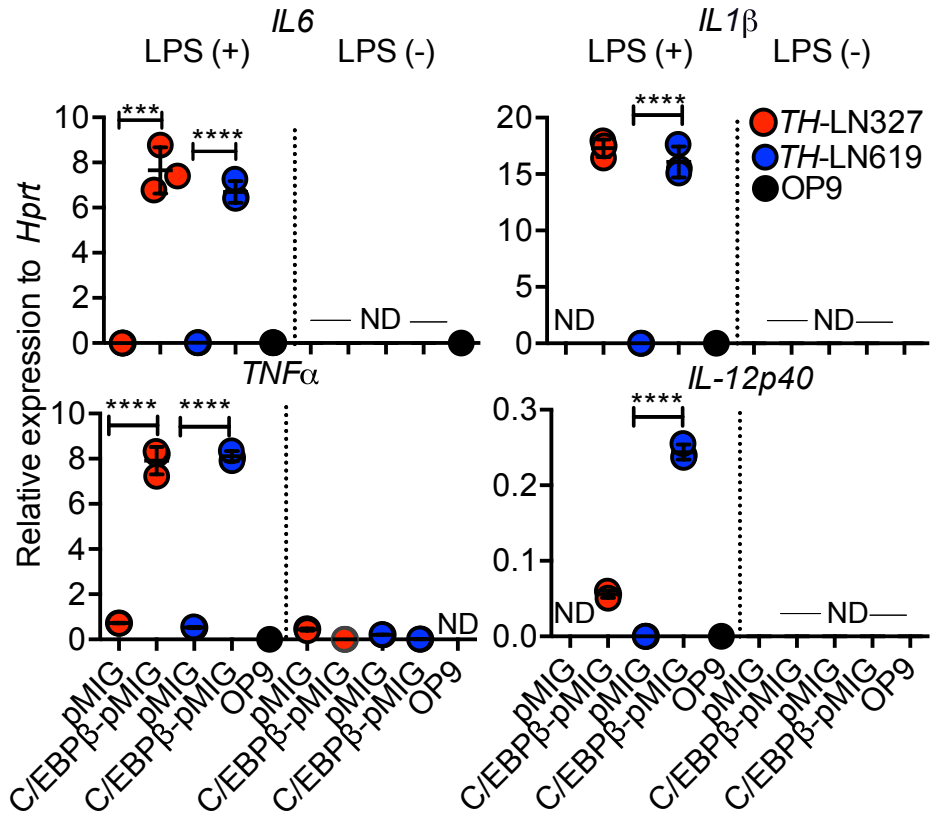

**a**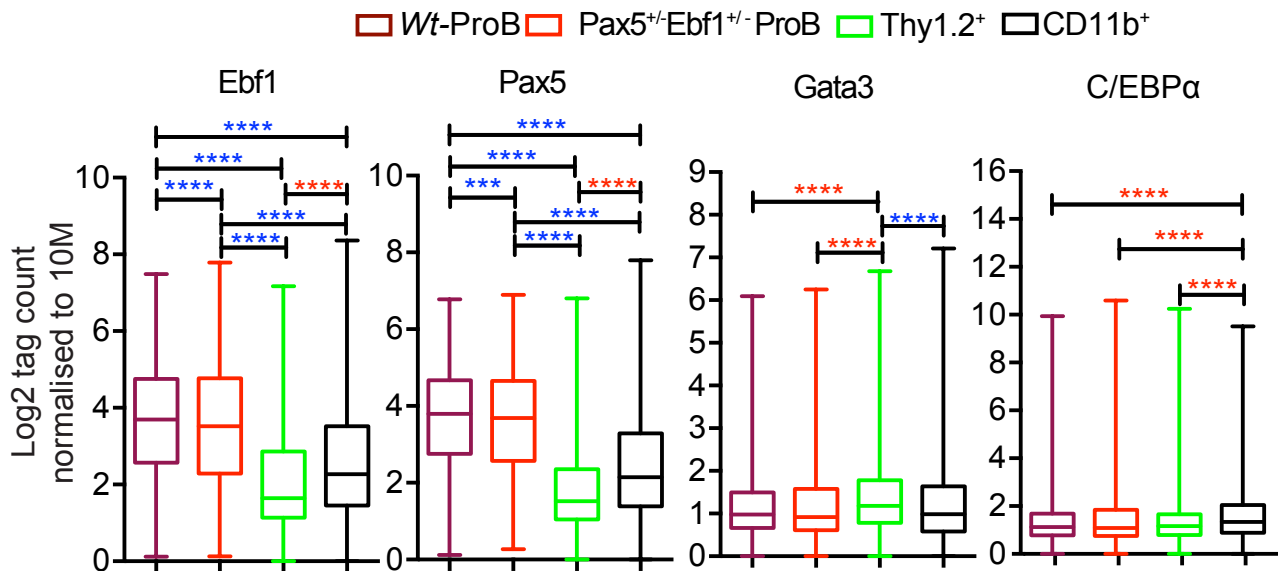**b**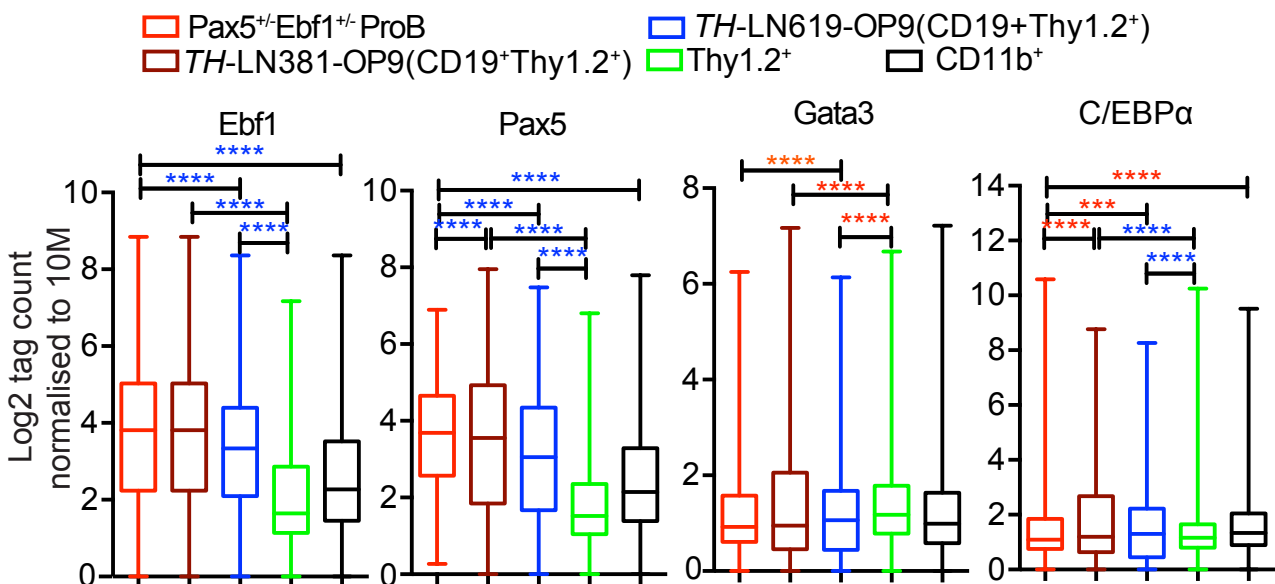



Supplementary figure 9(S9)

A

NOTCH1 status  wt  Mutated

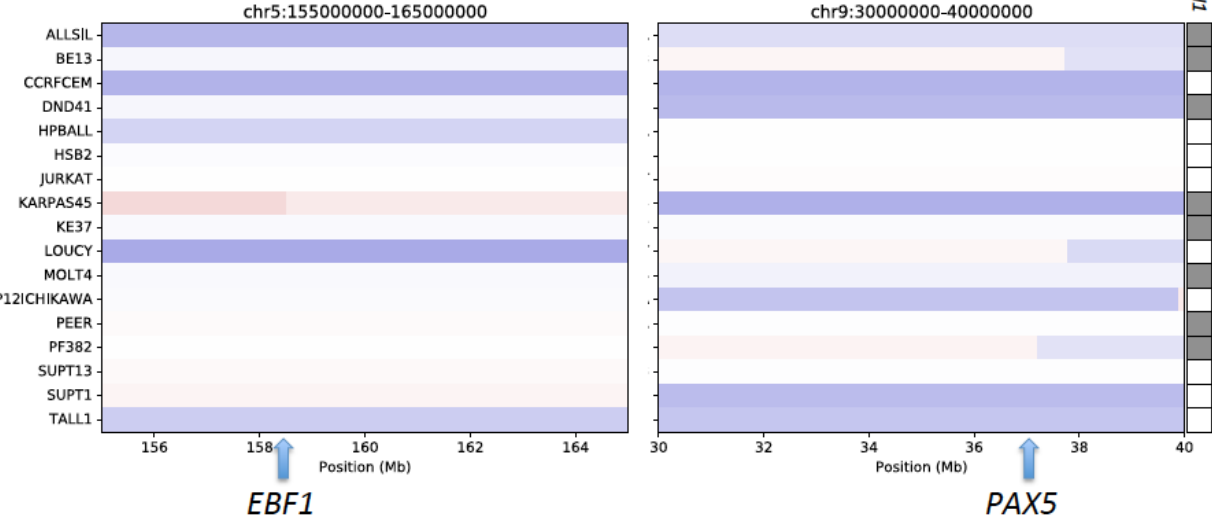

B

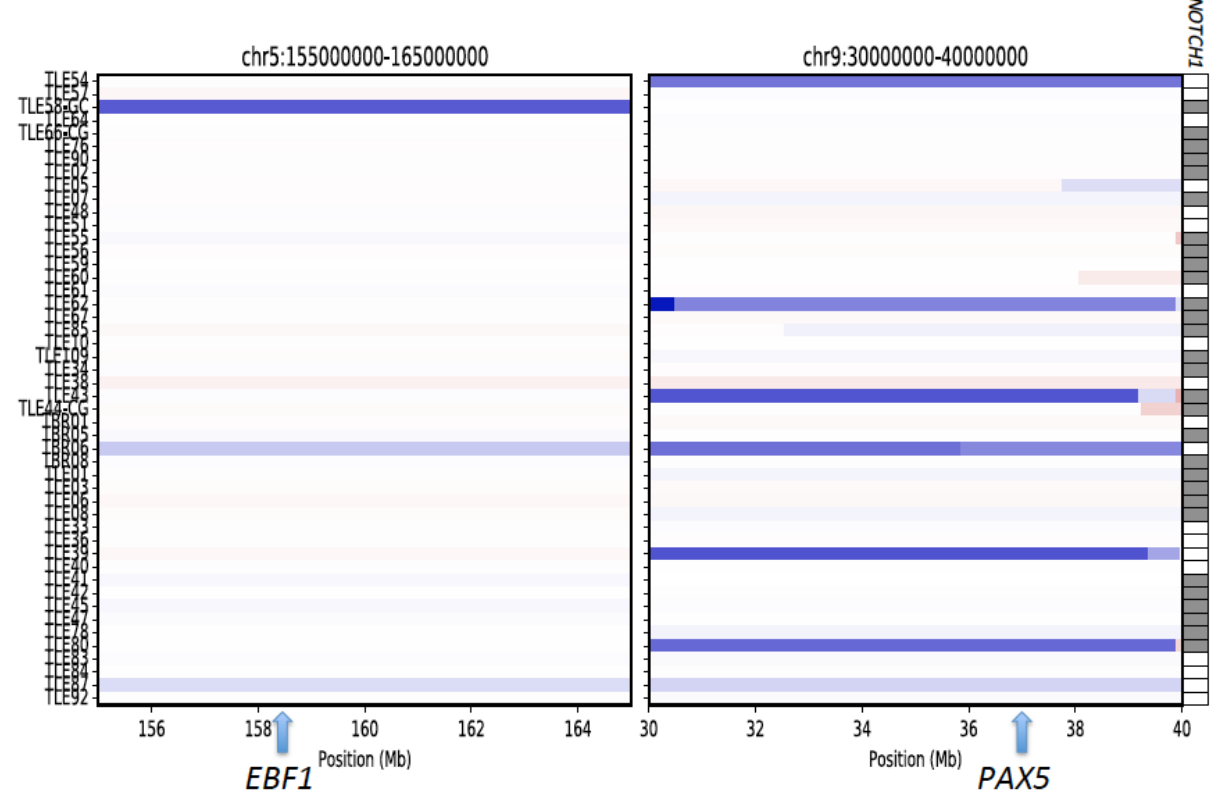

Supplement: supp_gad.285536.116_Supplemental_Figures_1-9.pdf [file supp_gad.285536.116_Supplemental_Figures_1-9.pdf]
